# Supplementary material for: A Gnotobiotic Mouse Model with Divergent Equol-Producing Phenotypes: Potential for Determining Microbial-Driven Health Impacts of Soy Isoflavone Daidzein
Source: MDPI journal article supplement (doi:10.3390/nu16071079), 2024-04-06
Supplement: s1 [file s1]

**Supplemental Table S1. Bacterial culture media and incubation times.** The following broth and agar were used for the growth of each strain in this study. All strains were grown anaerobically at 37 °C. Agar incubation requires an additional 1–2 days to achieve optimal colony growth.

| Species                             | Culture Broth                                                                 | Agar                                                                            | Broth Incubation Time |
|-------------------------------------|-------------------------------------------------------------------------------|---------------------------------------------------------------------------------|-----------------------|
| <i>Bacteroides caccae</i>           | Anaerobic Basal Broth (ABB, DSMZ Medium 1203a)                                | Brucella Blood Agar (BBA, Thermo Scientific (Cat. No. BD 211086) with 5% blood) | 12–24 hours           |
| <i>Bacteroides thetaiotaomicron</i> | ABB                                                                           | BBA                                                                             | 12–24 hours           |
| <i>Bacteroides uniformis</i>        | ABB                                                                           | BBA                                                                             | 36–48 hours           |
| <i>Roseburia intestinalis</i>       | Yeast Casitone Fatty Acid (YCFA) broth                                        | YCFA agar                                                                       | 12–24 hours           |
| <i>Faecalibacterium duncaniae</i>   | Reinforced Clostridia Media (RCM, Thermo Scientific (Cat. No. CM0149B)) broth | RCM agar                                                                        | 12–24 hours           |
| <i>Agathobacter rectalis</i>        | PGY (DSMZ Medium 104)                                                         | BBA                                                                             | 36–48 hours           |
| <i>Coprococcus comes</i>            | ABB                                                                           | BBA                                                                             | 12–24 hours           |
| <i>Akkermansia muciniphila</i>      | Anaerobic Brain Heart Infusion broth (A-BHI, ATCC Medium 2187) + 0.4% Mucin   | Tryptic Soy Agar (TSA) + 5% Blood (ATCC Medium 260)                             | 36–48 hours           |
| <i>Providencia stuartii</i>         | Nutrient Broth (NB, ATCC Medium 3)                                            | TSA + 5% Blood                                                                  | 12–24 hours           |
| <i>Collinsella aerofaciens</i>      | ABB                                                                           | BBA or RCM                                                                      | 12–24 hours           |
| <i>Adlercreutzia equolifaciens</i>  | Wilkins-Chagrin (WC, Thermo Scientific (Cat. No. CM0643B)) broth              | WC agar                                                                         | 48–72 hours           |
